# Supplementary material for: Tmub1 Suppresses Hepatocellular Carcinoma by Promoting the Ubiquitination of ΔNp63 Isoforms
Source: PubMed Central journal article supplement — Mol Ther Oncolytics. 2020 Jun 4;18:126–36. doi: 10.1016/j.omto.2020.06.005 (PMC7338996; doi:10.1016/j.omto.2020.06.005), 2020-06-04
Supplement: mmc1.pdf [file mmc1.pdf]

OMTO, Volume 18

## **Supplemental Information**

### **Tmub1 Suppresses Hepatocellular Carcinoma by Promoting the Ubiquitination of $\Delta$ Np63 Isoforms**

**Hangwei Fu, Yida Zhang, Junying Chen, Bo Zhou, Geng Chen, and Ping Chen**

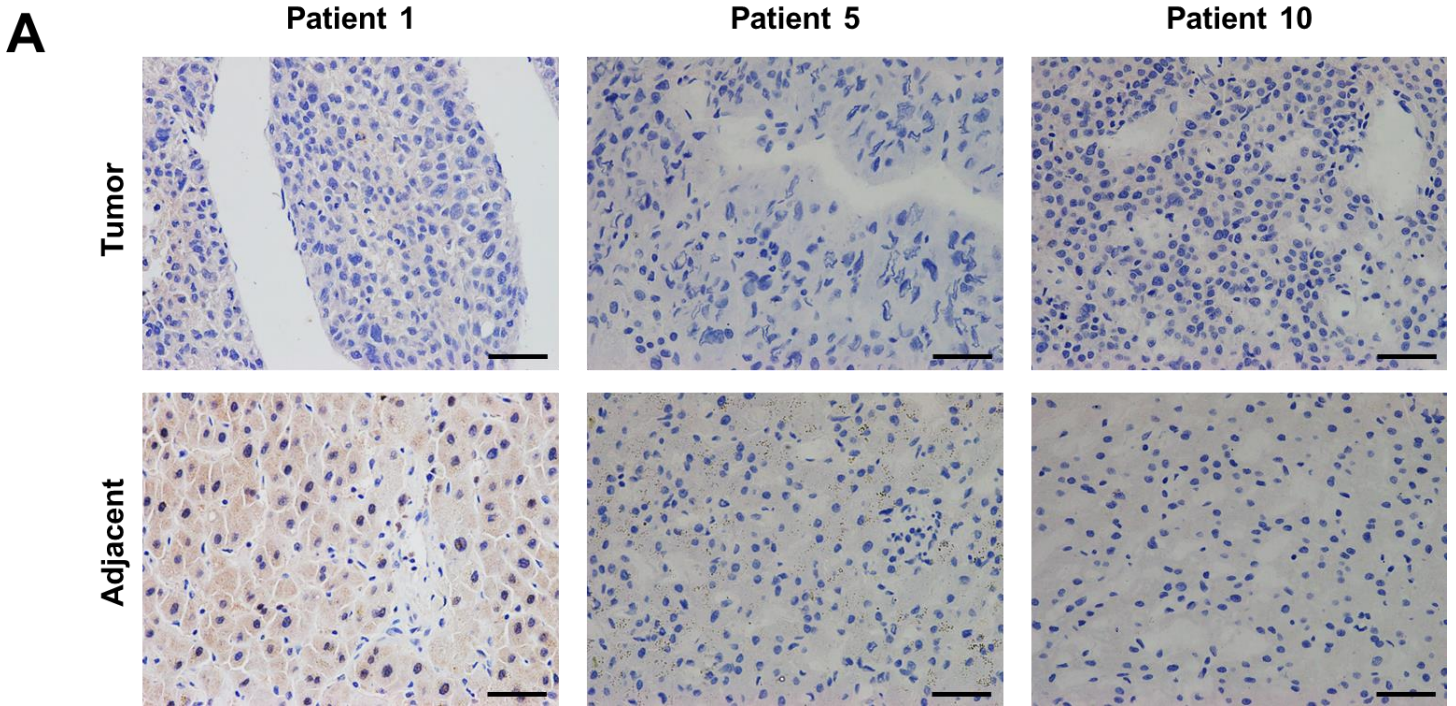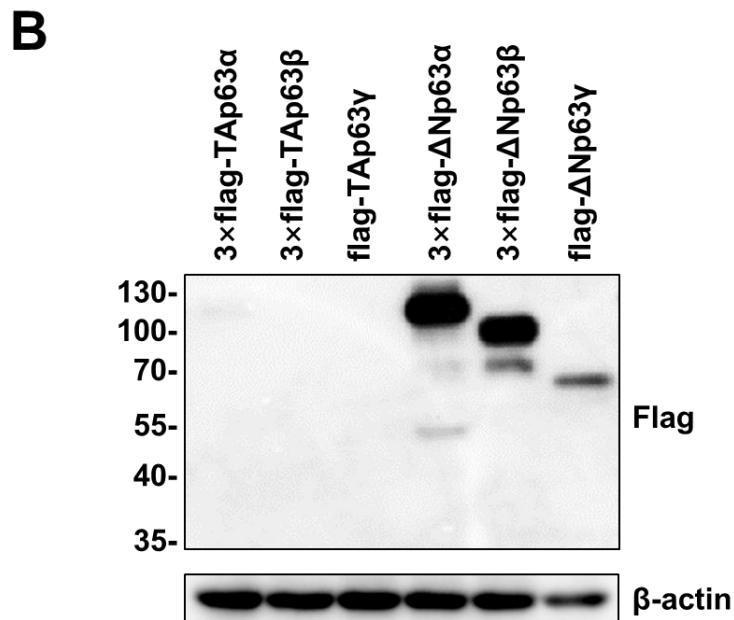

**Fig. S1 TAp63 expression is low in HCC.** (A) Representative images of immunohistochemistry assays on the HCC tissue microarray (400X). Most of the HCC tissues showed extremely low expression of TAp63 protein. Positive staining was occasionally found in adjacent tissues. (B) TAp63 isoforms are quickly degraded in Hep3B cells. Hep3B cells were transfected with flag-p63 isoform constructs. Thirty-six hours after transfection, whole cell lysates were collected and subjected to immunoblotting.

# MHCC-LM3

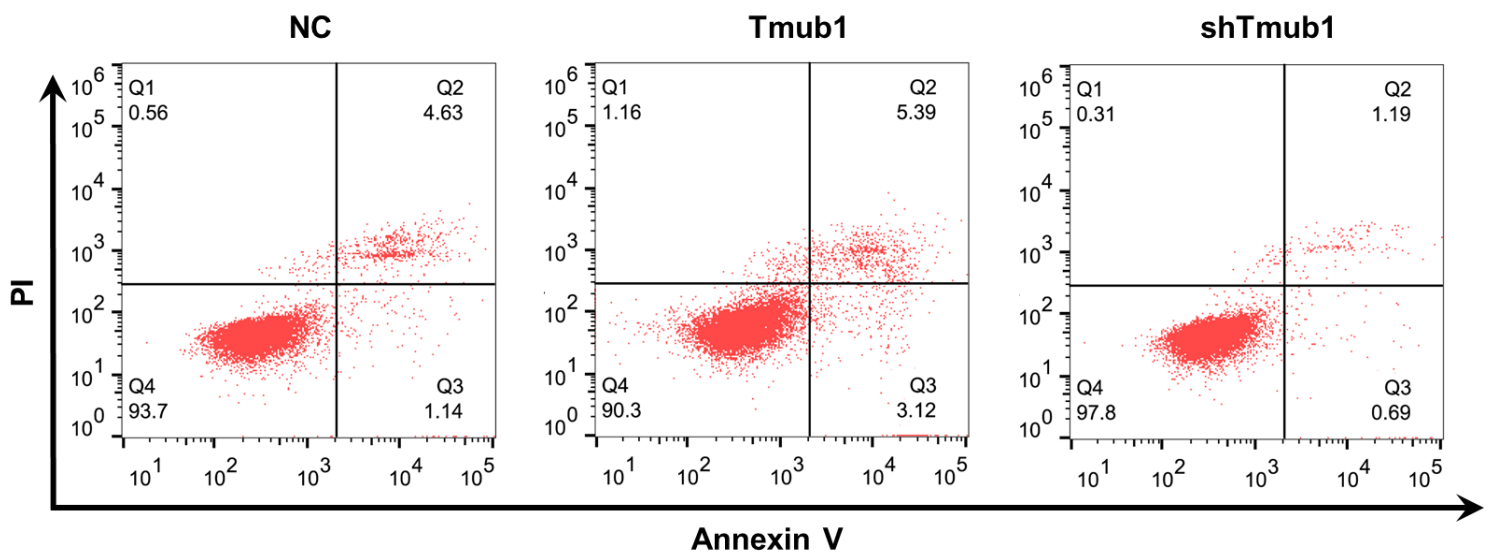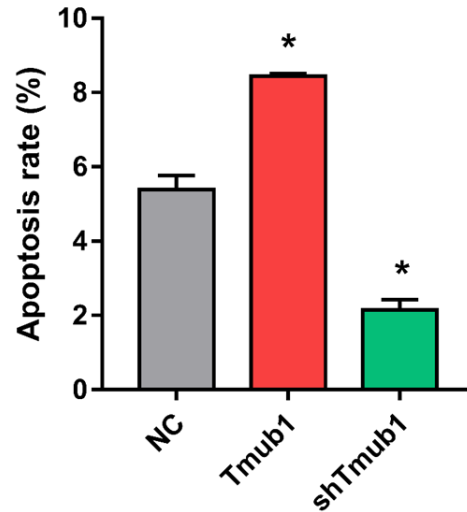

**Fig. S2 Tmub1 promotes MHCC-LM3 apoptosis.** Flow cytometric analysis of MHCC-LM3 cells transfected with negative control (NC), Tmub1, or Tmub1 shRNA plasmids. Forty-eight hours after transfection, cells were collected and stained with Annexin V/PI, which was followed by flow cytometry assays to determine the apoptosis rate. \*:  $p < 0.05$  compared with the NC cells.
